# Supplementary material for: Network analysis of transcriptomic diversity amongst resident tissue macrophages and dendritic cells in the mouse mononuclear phagocyte system
Source: PubMed Central journal article supplement (PMC7575120; doi:10.1371/journal.pbio.3000859), 2020-10-08
Supplement: pbio.3000859.s006.pdf [file pbio.3000859.s006.pdf]

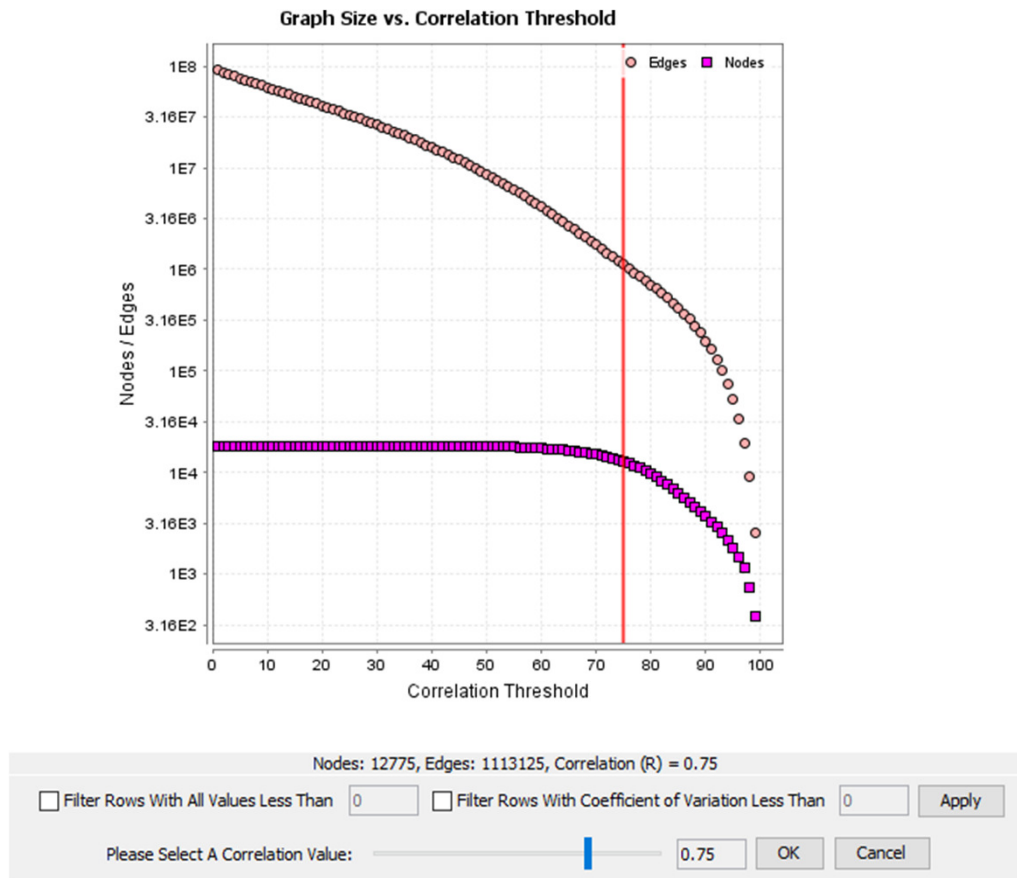

**S6 Fig. Graph size compared with correlation threshold for the analysis of the mouse macrophage dataset.** The chosen correlation threshold of 0.75 resulted in inclusion of 12,775 nodes making 1,113,125 edges (correlations of  $\geq 0.75$ ) between them.
